# Supplementary material for: Nitrogen-Doped Reduced Graphene Oxide Supported Pd4.7Ru Nanoparticles Electrocatalyst for Oxygen Reduction Reaction
Source: MDPI journal article supplement (doi:10.3390/nano11102727), 2021-10-15
Supplement: s1 [file s1]

# Nitrogen-Doped Reduced Graphene Oxide Supported Pd<sub>4.7</sub>Ru Nanoparticles Electrocatalyst for Oxygen Reduction Reaction

Gil-Ryeong Park <sup>1</sup>, Seung Geun Jo <sup>1</sup>, Anuraj Varyambath <sup>1</sup>, Jeonghyun Kim <sup>2,\*</sup> and Jung Woo Lee <sup>1,\*</sup>

<sup>1</sup> Department of Materials Science and Engineering, Pusan National University, Busan 46241, Korea;

rlffud1479@pusan.ac.kr (G.-R.P.); linkroot1128@pusan.ac.kr (S.G.J.); anurajvaryambath@gmail.com (A.V.)

<sup>2</sup> Department of Electronic Convergence Engineering, Kwangju University, Seoul 01899, Korea

\* Correspondence: jkim@kw.ac.kr (J.K.); jungwoolee@pusan.ac.kr (J.W.L.); Tel.: +82-51-510-2898 (J.W.L.)

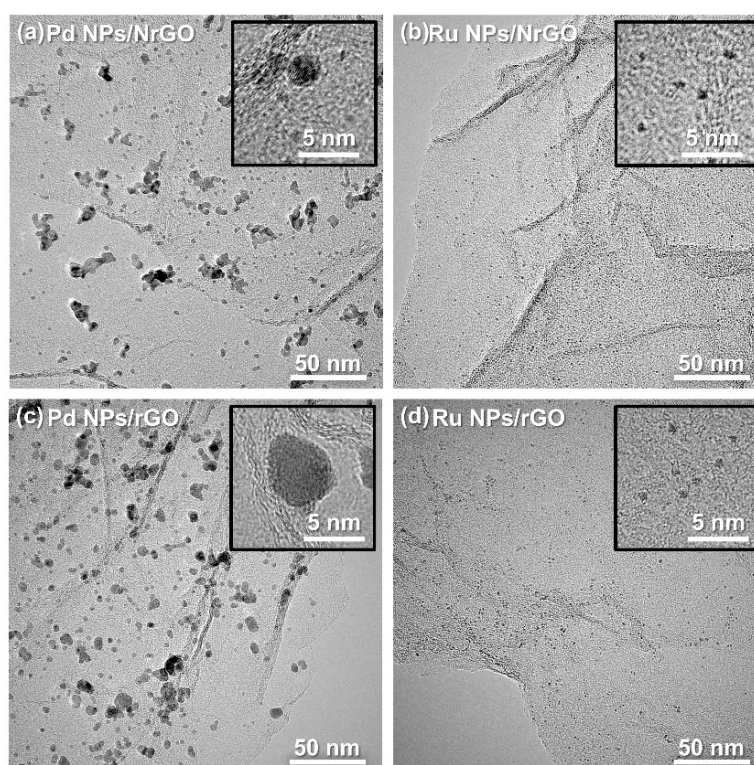

**Figure S1.** TEM images of the (a) Pd NPs/NrGO, (b) Ru NPs/NrGO, (c) Pd NPs/rGO and (d) Ru NPs/rGO.

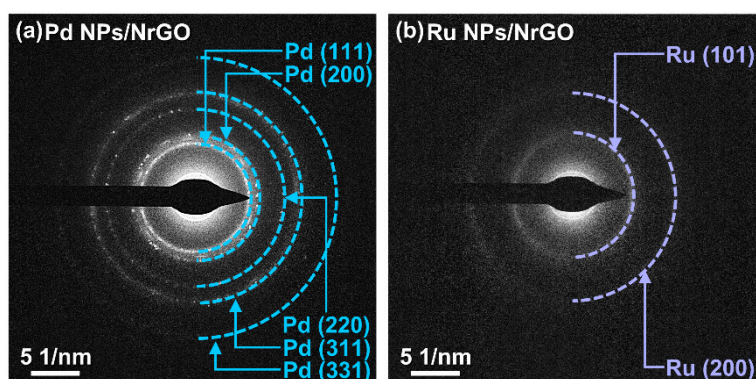

**Figure S2.** SAED patterns of the (a) Pd NPs/NrGO and (b) Ru NPs/NrGO.

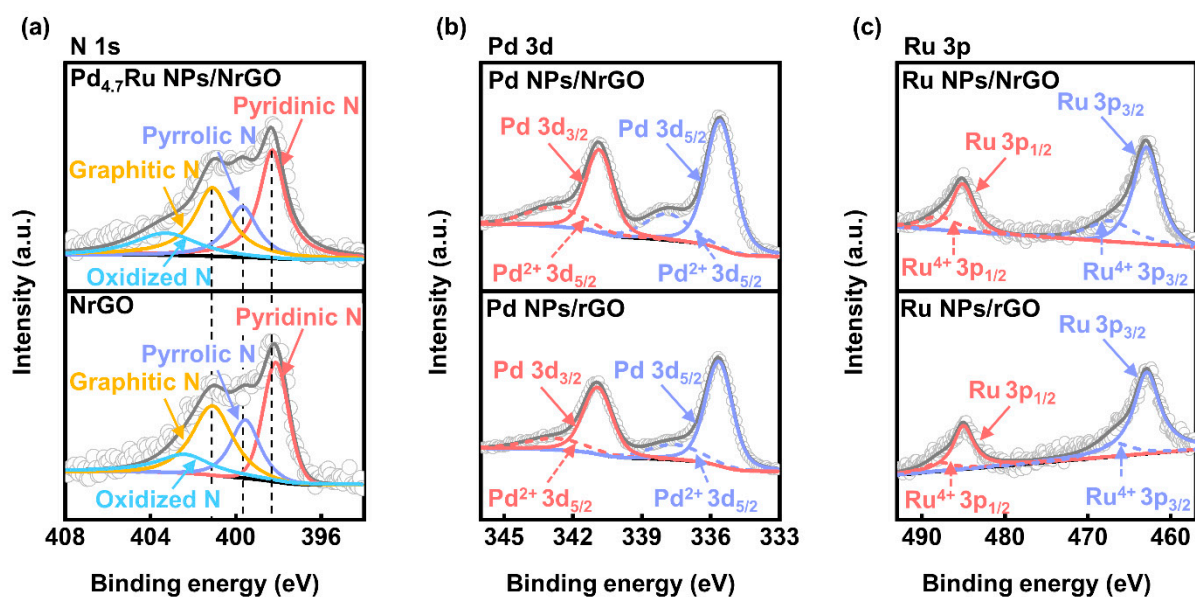

**Figure S3.** XPS survey spectra of (a) N 1s of the  $\text{Pd}_{4.7}\text{Ru NPs/NrGO}$  and  $\text{NrGO}$  with dotted line for shifts comparison of pyridinic N, pyrrolic N, and graphitic N, (b) Pd 3d of the  $\text{Pd NPs/NrGO}$  and  $\text{Pd NPs/rGO}$ , and (c) Ru 3p of the  $\text{Ru NPs/NrGO}$ ,  $\text{Ru NPs/rGO}$ .

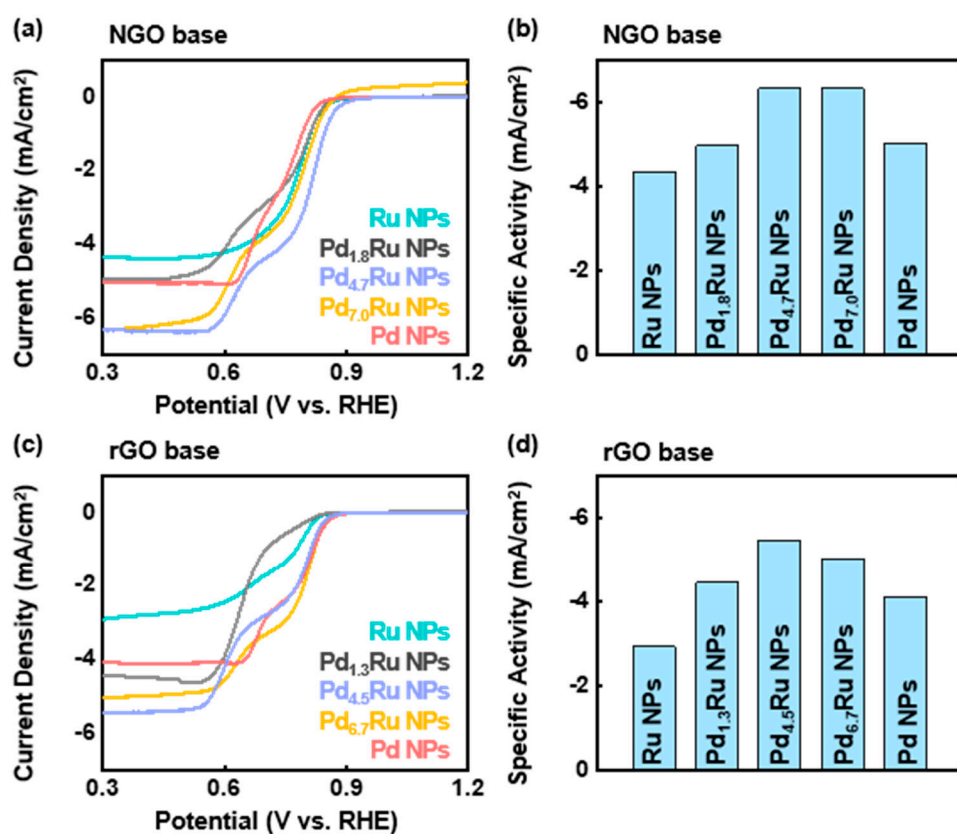

**Figure S4.** LSV curves of the (a) Pd-Ru NPs/NrGO catalysts, (c) Pd-Ru NPs/rGO catalysts and (b), (d) their corresponding specific activities at  $0.3 V_{\text{RHE}}$ .

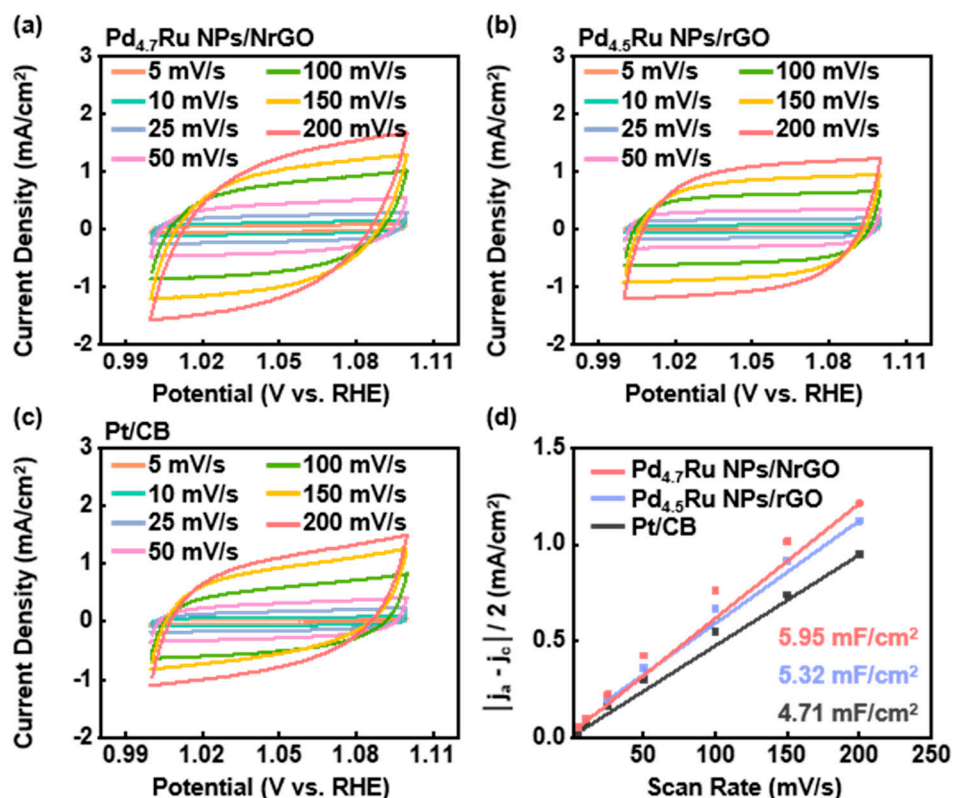

**Figure S5.** CV curves of the (a)  $\text{Pd}_{4.7}\text{Ru}$  NPs/NrGO, (b)  $\text{Pd}_{4.5}\text{Ru}$  NPs/rGO and (c) Pt/CB between 1.00 and 1.10  $\text{V}_{\text{RHE}}$  at different scan rates of 5, 10, 25, 50, 100, 150 and 200  $\text{mV}/\text{s}$ . (d) Linear fittings of current densities at 1.05  $\text{V}_{\text{RHE}}$  versus scan rates for the CV tests.

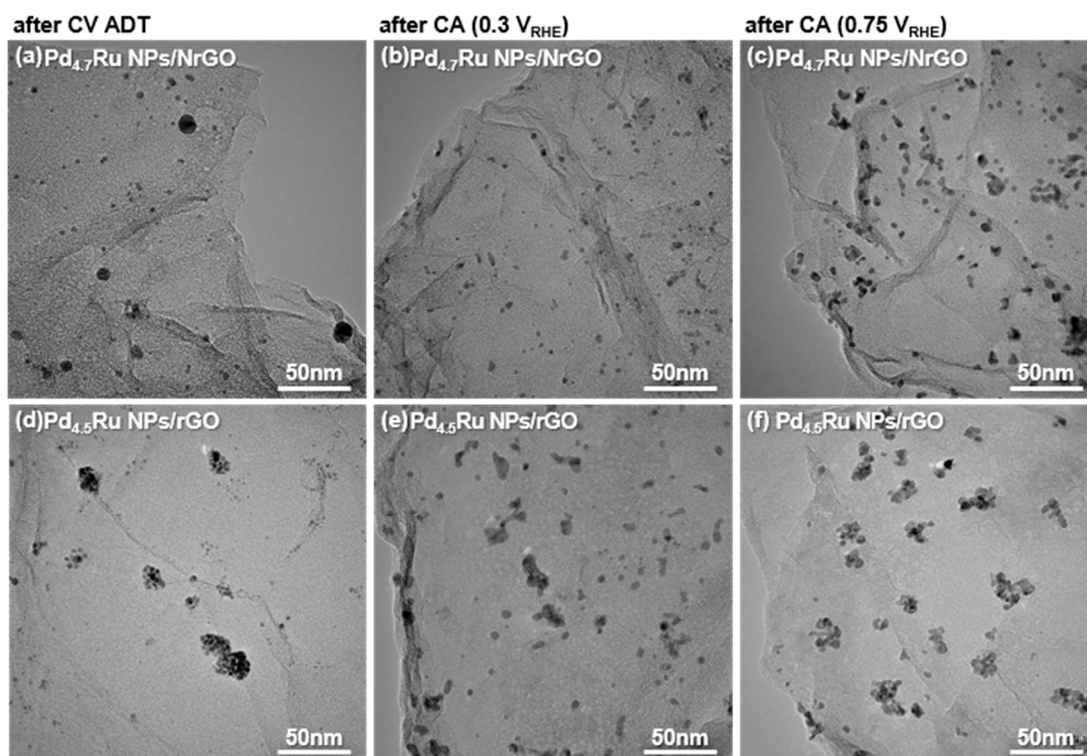

**Figure S6.** TEM images of  $\text{Pd}_{4.7}\text{Ru}$  NPs/NrGO after (a) 1000 cycles CV ADT, (b) CA at 0.3  $\text{V}_{\text{RHE}}$ , (c) CA at 0.75  $\text{V}_{\text{RHE}}$  and of  $\text{Pd}_{4.5}\text{Ru}$  NPs/rGO after (a) 1000 cycles CV ADT, (b) CA at 0.3  $\text{V}_{\text{RHE}}$ , (c) CA at 0.75  $\text{V}_{\text{RHE}}$ .



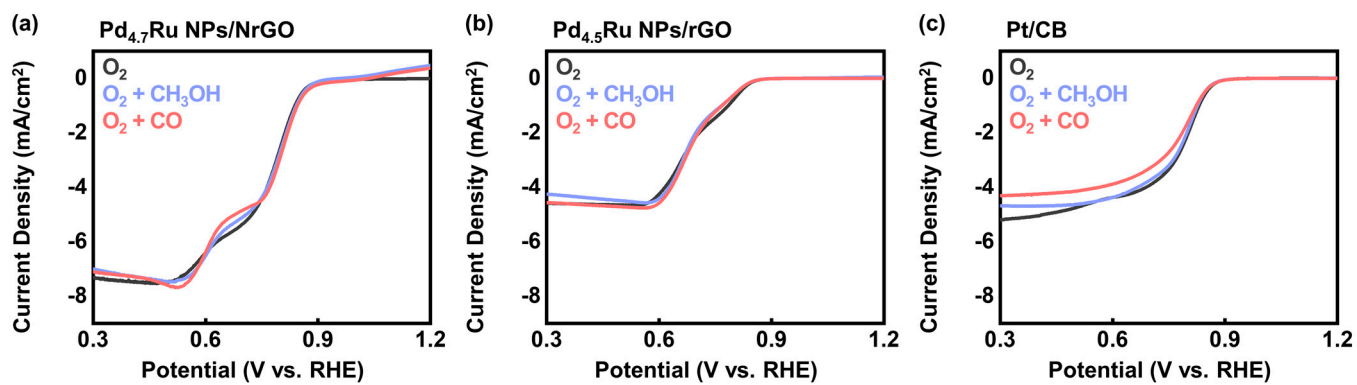

**Figure S7.** The response of (a)  $\text{Pd}_{4.7}\text{Ru}$  NPs/NrGO, (b)  $\text{Pd}_{4.5}\text{Ru}$  NPs/rGO, and (c) Pt/CB to  $\text{CO}$  saturation and 1 M  $\text{CH}_3\text{OH}$  in 0.1 M KOH.

**Table S1.** Elemental contents and of the Pd–Ru NPs/NrGO and Pd–Ru NPs/rGO determined from ICP-OES.

| Sample                             | Atomic percent |        | Sample                            | Atomic percent |        |
|------------------------------------|----------------|--------|-----------------------------------|----------------|--------|
|                                    | Pd (%)         | Ru (%) |                                   | Pd (%)         | Ru (%) |
| <b>Pd<sub>1.8</sub>Ru NPs/NrGO</b> | 64.5           | 35.5   | <b>Pd<sub>1.3</sub>Ru NPs/rGO</b> | 57.2           | 42.8   |
| <b>Pd<sub>4.7</sub>Ru NPs/NrGO</b> | 82.5           | 17.5   | <b>Pd<sub>4.5</sub>Ru NPs/rGO</b> | 81.8           | 18.1   |
| <b>Pd<sub>7.0</sub>Ru NPs/NrGO</b> | 87.5           | 12.5   | <b>Pd<sub>6.7</sub>Ru NPs/rGO</b> | 87.0           | 13.0   |

**Table S2.** D-spacing values of the Pd<sub>4.7</sub>Ru NPs/NrGO, Pd NPs/NrGO, and Ru NPs/NrGO calculated from SAED pattens.

| Sample                             | Pd d-spacing (nm) |       |       |       |       | Ru d-spacing (nm) |       |
|------------------------------------|-------------------|-------|-------|-------|-------|-------------------|-------|
|                                    | (111)             | (200) | (220) | (311) | (331) | (101)             | (200) |
| <b>Pd<sub>4.7</sub>Ru NPs/NrGO</b> | 0.220             | 0.191 | 0.137 | 0.116 | 0.088 |                   |       |
| <b>Pd NPs/NrGO</b>                 | 0.223             | 0.198 | 0.140 | 0.119 | 0.090 |                   |       |
| <b>Ru NPs/NrGO</b>                 |                   |       |       |       |       | 0.205             | 0.118 |

**Table S3.** Comparison of the onset potential of Pd<sub>4.7</sub>Ru NPs/NrGO with previously reported Pd and Ru catalysts towards ORR.

| Sample                             | E <sub>onset</sub> (V <sub>RHE</sub> ) | Reference        |
|------------------------------------|----------------------------------------|------------------|
| <b>Pd<sub>4.7</sub>Ru NPs/NrGO</b> | <b>0.913</b>                           | <b>This work</b> |
| <b>Pd-Cu NCs/RGOs</b>              | <b>0.89</b>                            | [1]              |
| <b>Pd-RGOs</b>                     | <b>0.86</b>                            | [1]              |
| <b>rGO/Pd</b>                      | <b>0.85</b>                            | [2]              |
| <b>Pd-tGO</b>                      | <b>0.89</b>                            | [3]              |
| <b>Pd<sub>100</sub>/CNS</b>        | <b>0.89</b>                            | [4]              |
| <b>N-rGO-Pd</b>                    | <b>0.91</b>                            | [5]              |
| <b>Pd NP/MWCNT</b>                 | <b>0.85</b>                            | [6]              |
| <b>Pd<sub>3</sub>Co/C</b>          | <b>0.85</b>                            | [7]              |

## References

1. Lv, J.-J.; Li, S.-S.; Wang, A.-J.; Mei, L.-P.; Feng, J.-J.; Chen, J.-R.; Chen, Z. One-pot synthesis of monodisperse palladium–copper nanocrystals supported on reduced graphene oxide nanosheets with improved catalytic activity and methanol tolerance for oxygen reduction reaction. *J. Power Sources* **2014**, *269*, 104–110.
2. Huang, Y.-X.; Xie, J.-F.; Zhang, X.; Xiong, L.; Yu, H.-Q. Reduced graphene oxide supported palladium nanoparticles via photoassisted citrate reduction for enhanced electrocatalytic activities. *ACS applied materials & interfaces* **2014**, *6*, 15795–15801.
3. Yun, M.; Ahmed, M.S.; Jeon, S. Thiolated graphene oxide-supported palladium cobalt alloyed nanoparticles as high performance electrocatalyst for oxygen reduction reaction. *J. Power Sources* **2015**, *293*, 380–387.
4. Yan, W.; Tang, Z.; Wang, L.; Wang, Q.; Yang, H.; Chen, S. PdAu alloyed clusters supported by carbon nanosheets as efficient electrocatalysts for oxygen reduction. *Int. J. Hydrogen Energy* **2017**, *42*, 218–227.
5. Ejaz, A.; Jeon, S. The individual role of pyrrolic, pyridinic and graphitic nitrogen in the growth kinetics of Pd NPs on N-rGO followed by a comprehensive study on ORR. *Int. J. Hydrogen Energy* **2018**, *43*, 5690–5702.
6. Jukk, K.; Alexeyeva, N.; Sarapuu, A.; Ritslaid, P.; Kozlova, J.; Sammelselg, V.; Tammeveski, K. Electroreduction of oxygen on sputter-deposited Pd nanolayers on multi-walled carbon nanotubes. *Int. J. Hydrogen Energy* **2013**, *38*, 3614–3620.
7. Rahul, R.; Singh, R.; Neergat, M. Effect of oxidative heat-treatment on electrochemical properties and oxygen reduction reaction (ORR) activity of Pd–Co alloy catalysts. *J. Electroanal. Chem.* **2014**, *712*, 223–229.
